# Supplementary material for: FEM Numerical and Experimental Work on Extrusion Welding of 7021 Aluminum Alloy
Source: MDPI journal article supplement (doi:10.3390/ma16175817), 2023-08-24
Supplement: s1 [file s1]

## Supplementary Materials

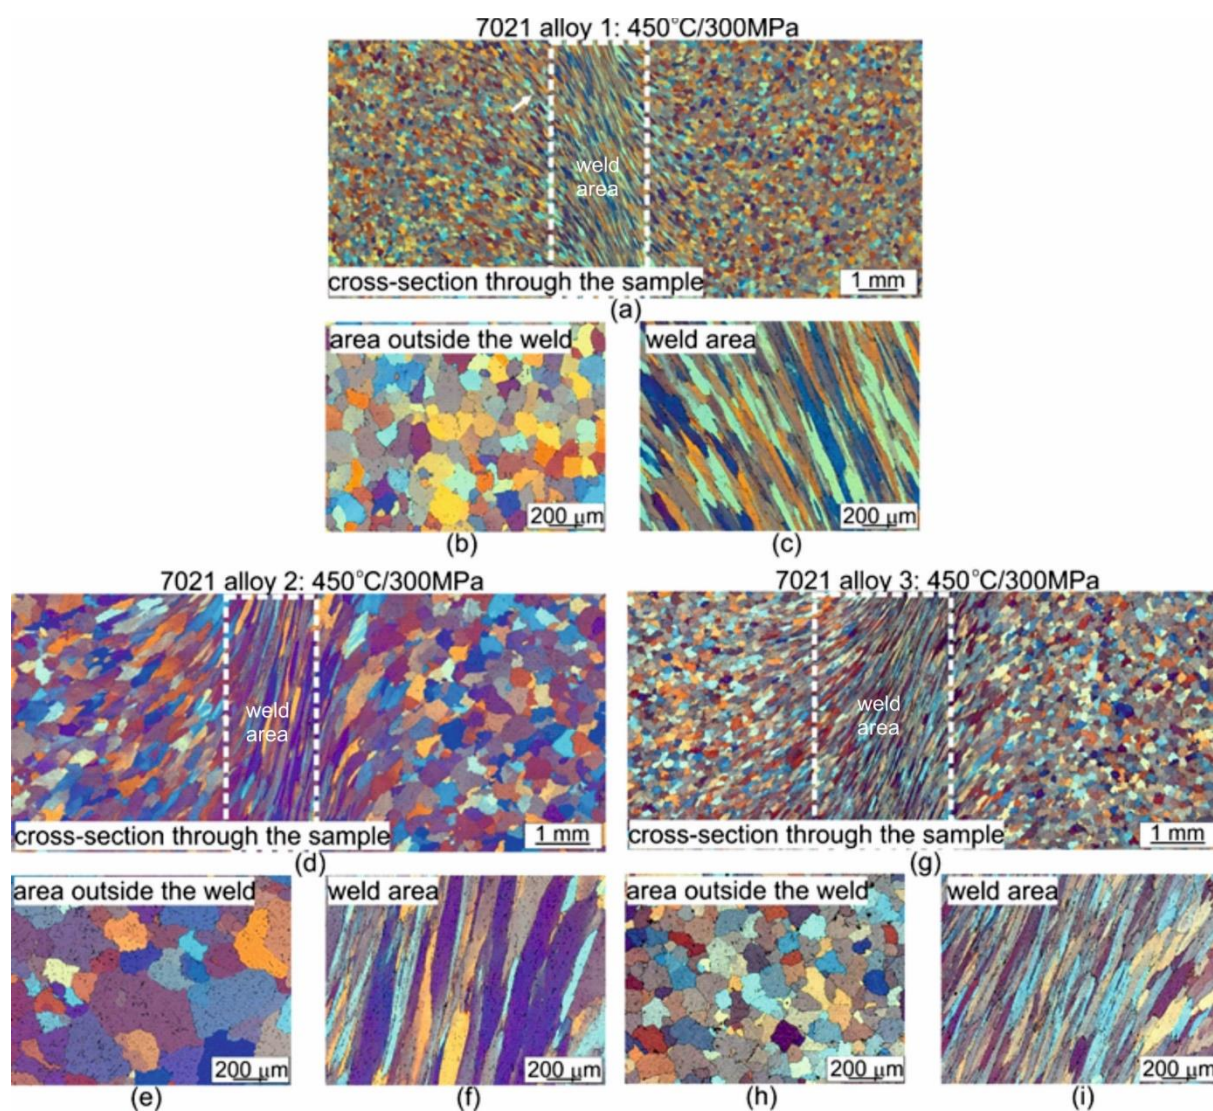

**Figure S1.** Microstructure of welded 7021 alloy in dependence of chemical composition; welding was performed under identical process parameters:  $T = 450\text{ }^{\circ}\text{C}$ ,  $p = 300\text{ MPa}$ ; (a, b, c) 7021 alloy 1: 1.20%Mg, 5.27%Zn, (d, e, f) 7021 alloy 2: 2.12%Mg, 5.47%Zn, (g, h, i) 7021 alloy 3: 2.12%Mg, 8.02%Zn; light microscopy.

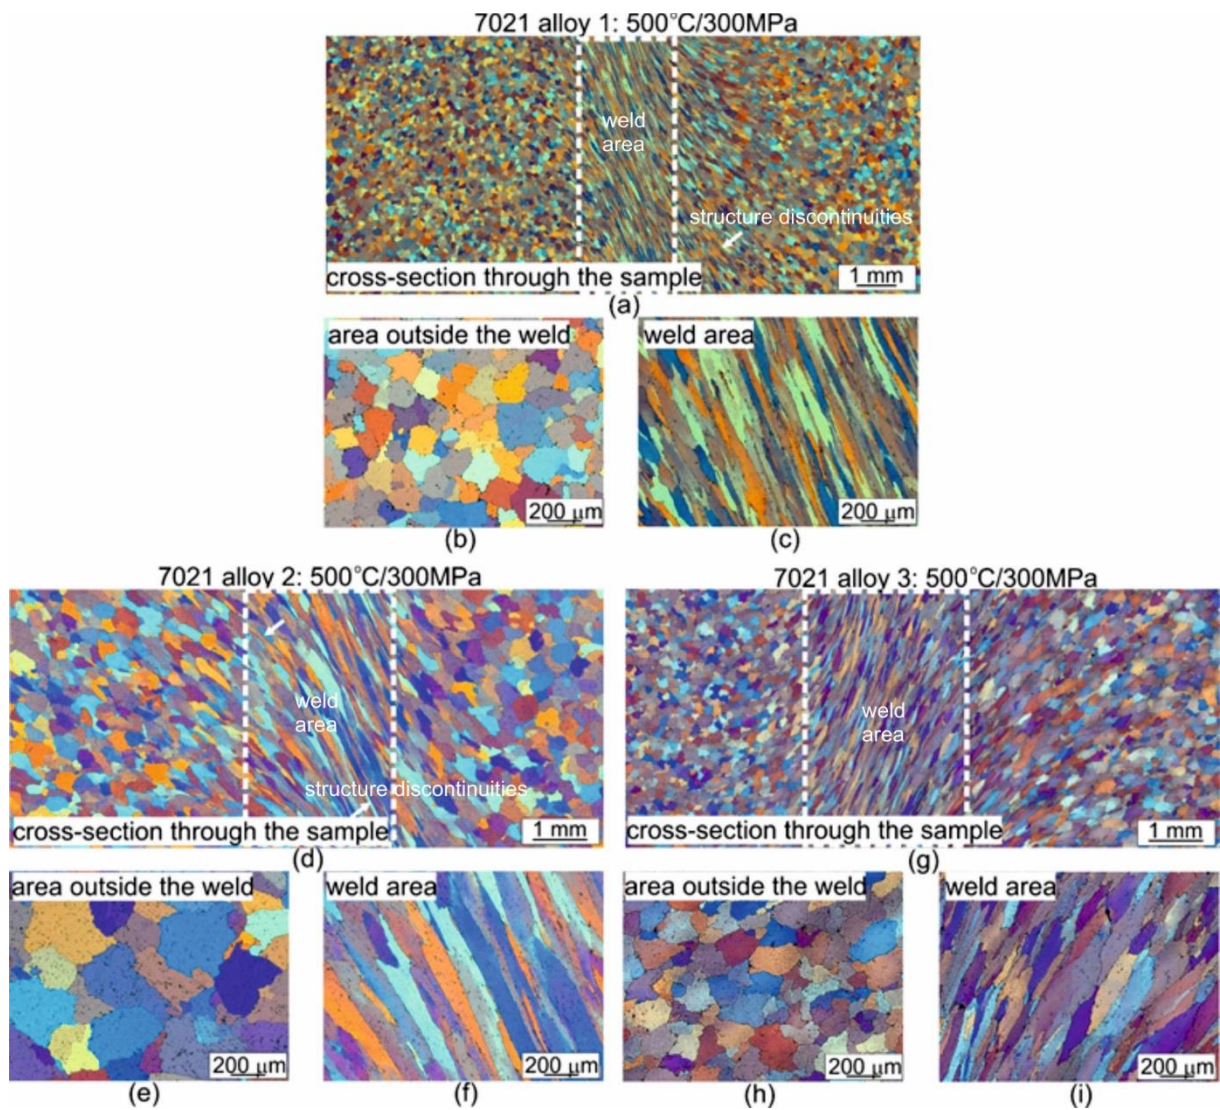

**Figure S2.** Microstructure of welded 7021 alloy in dependence of chemical composition; welding was performed under identical process parameters:  $T = 500\text{ }^{\circ}\text{C}$ ,  $p = 300\text{ MPa}$ ; (a, b, c) 7021 alloy 1: 1.20%Mg, 5.27%Zn, (d, e, f) 7021 alloy 2: 2.12%Mg, 5.47%Zn, (g, h, i) 7021 alloy 3: 2.12%Mg, 8.02%Zn; light microscopy.



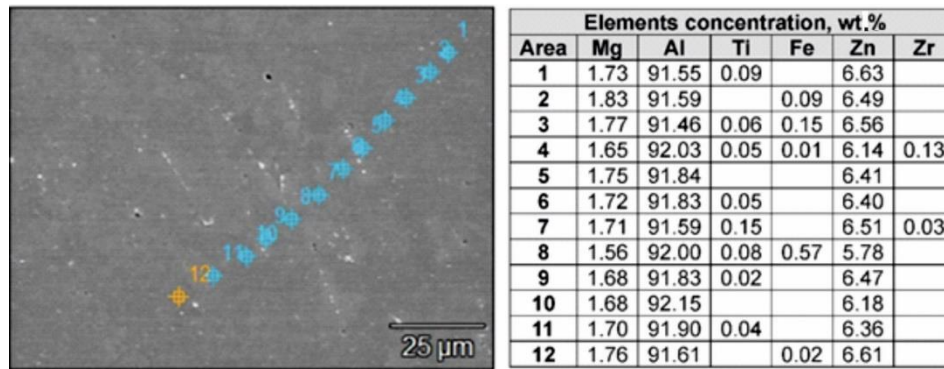

**Figure S3.** Microstructure of Alloy 2 in the area inside the weld and results of the chemical composition test on the grain cross-section; welding process conditions:  $T = 450\text{ }^{\circ}\text{C}$ ,  $p = 300\text{ MPa}$ ; SEM/EDS.

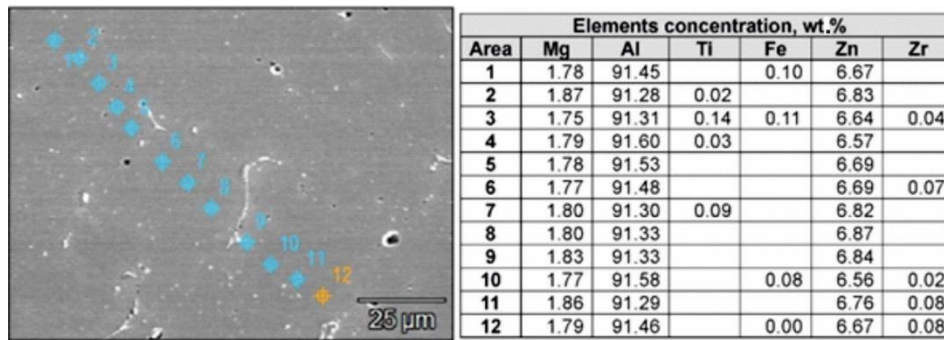

**Figure S4.** Microstructure of Alloy 2 in the area inside the weld and results of the chemical composition test on the grain cross-section; welding process conditions:  $T = 500\text{ }^{\circ}\text{C}$ ,  $p = 300\text{ MPa}$ ; SEM/EDS.

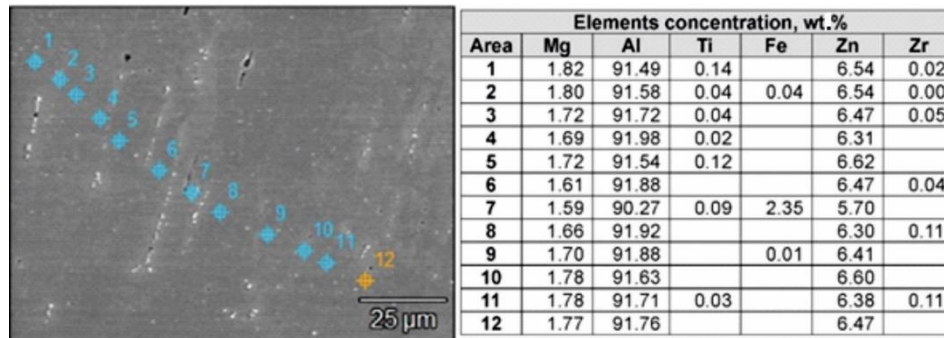

**Figure S5.** Microstructure of Alloy 2 in the area outside the weld and results of the chemical composition test on the grain cross-section; welding process conditions:  $T = 500\text{ }^{\circ}\text{C}$ ,  $p = 300\text{ MPa}$ ; SEM/EDS.

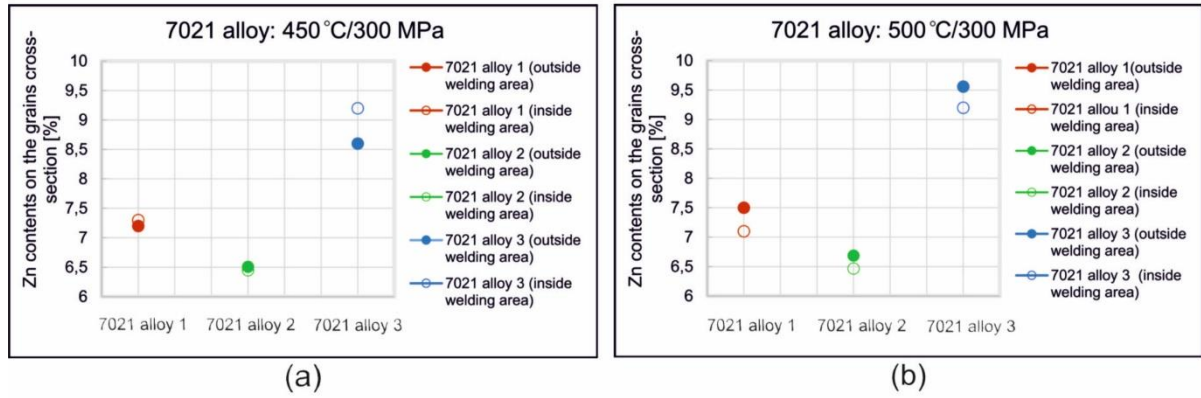

**Figure S6.** Average Zn content on the grain cross-section in the welding area and outside the welding area for the alloys tested: (a)  $T = 450\text{ }^{\circ}\text{C}$ ,  $p = 300\text{ MPa}$ , (b)  $T = 500\text{ }^{\circ}\text{C}$ ,  $p = 300\text{ MPa}$ .

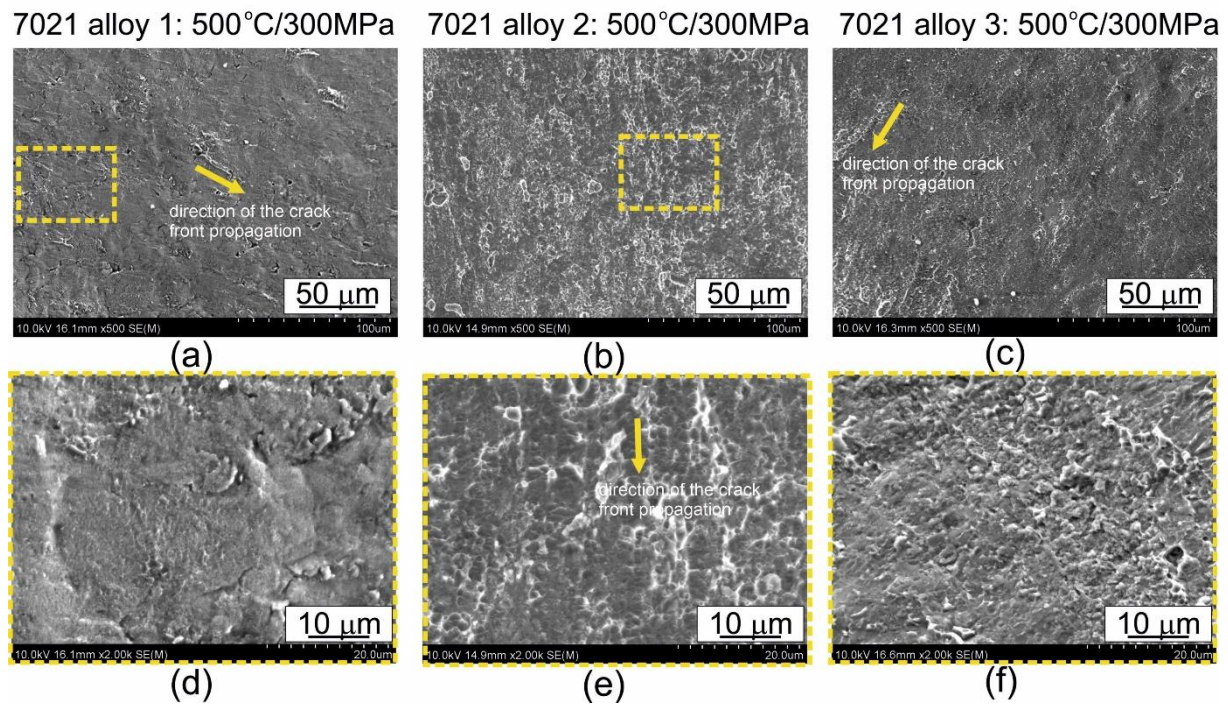

**Figure S7.** Fracture surfaces after uniaxial tensile test; welding was performed under identical process parameters:  $T = 500\text{ }^{\circ}\text{C}$ ,  $p = 300\text{ MPa}$ ; (a, d) 7021 alloy 1: 1.20%Mg, 5.27%Zn, (b, e) 7021 alloy 2: 2.12%Mg, 5.47%Zn, (c, f) 7021 alloy 3: 2.12%Mg, 8.02%Zn.

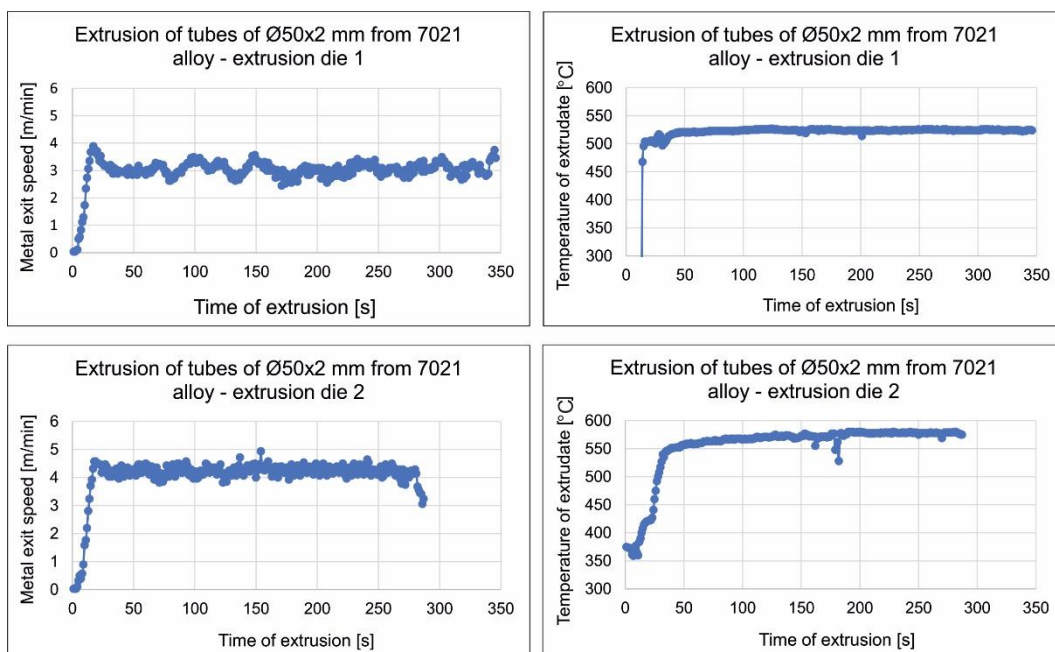

**Figure S8.** Registered exampled technological parameters of extrusion process of tubes of  $\varnothing 50 \times 2$  mm from 7021 alloy no 2 for extrusion die 1 and die 2: metal exit speed (on the left) and extrudates temperature (on the right).
